# Supplementary material for: Selinexor plus low-dose dexamethasone in Chinese patients with relapsed/refractory multiple myeloma previously treated with an immunomodulatory agent and a proteasome inhibitor (MARCH): a phase II, single-arm study
Source: PubMed Central journal article supplement (PMC8981703; doi:10.1186/s12916-022-02305-4), 2022-04-05

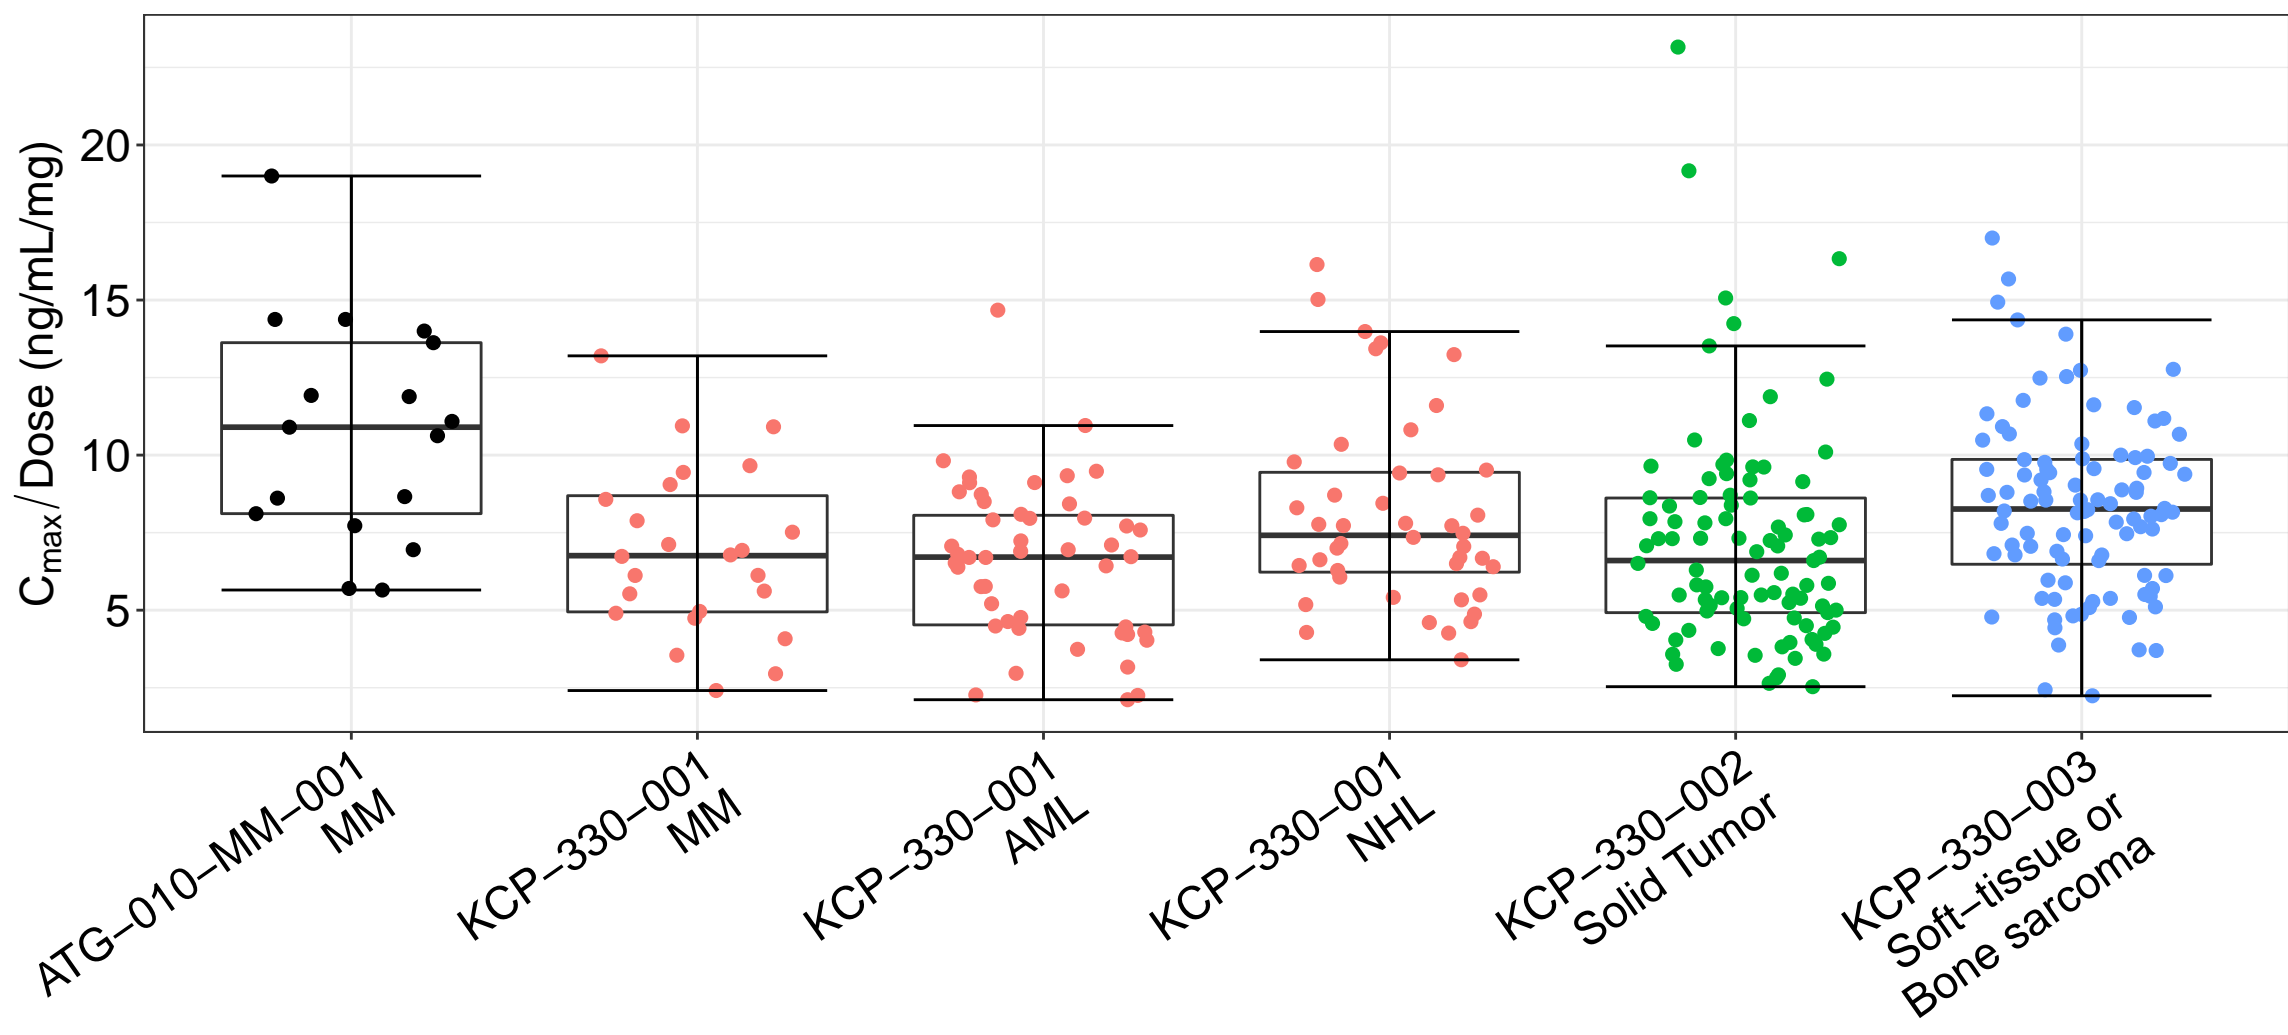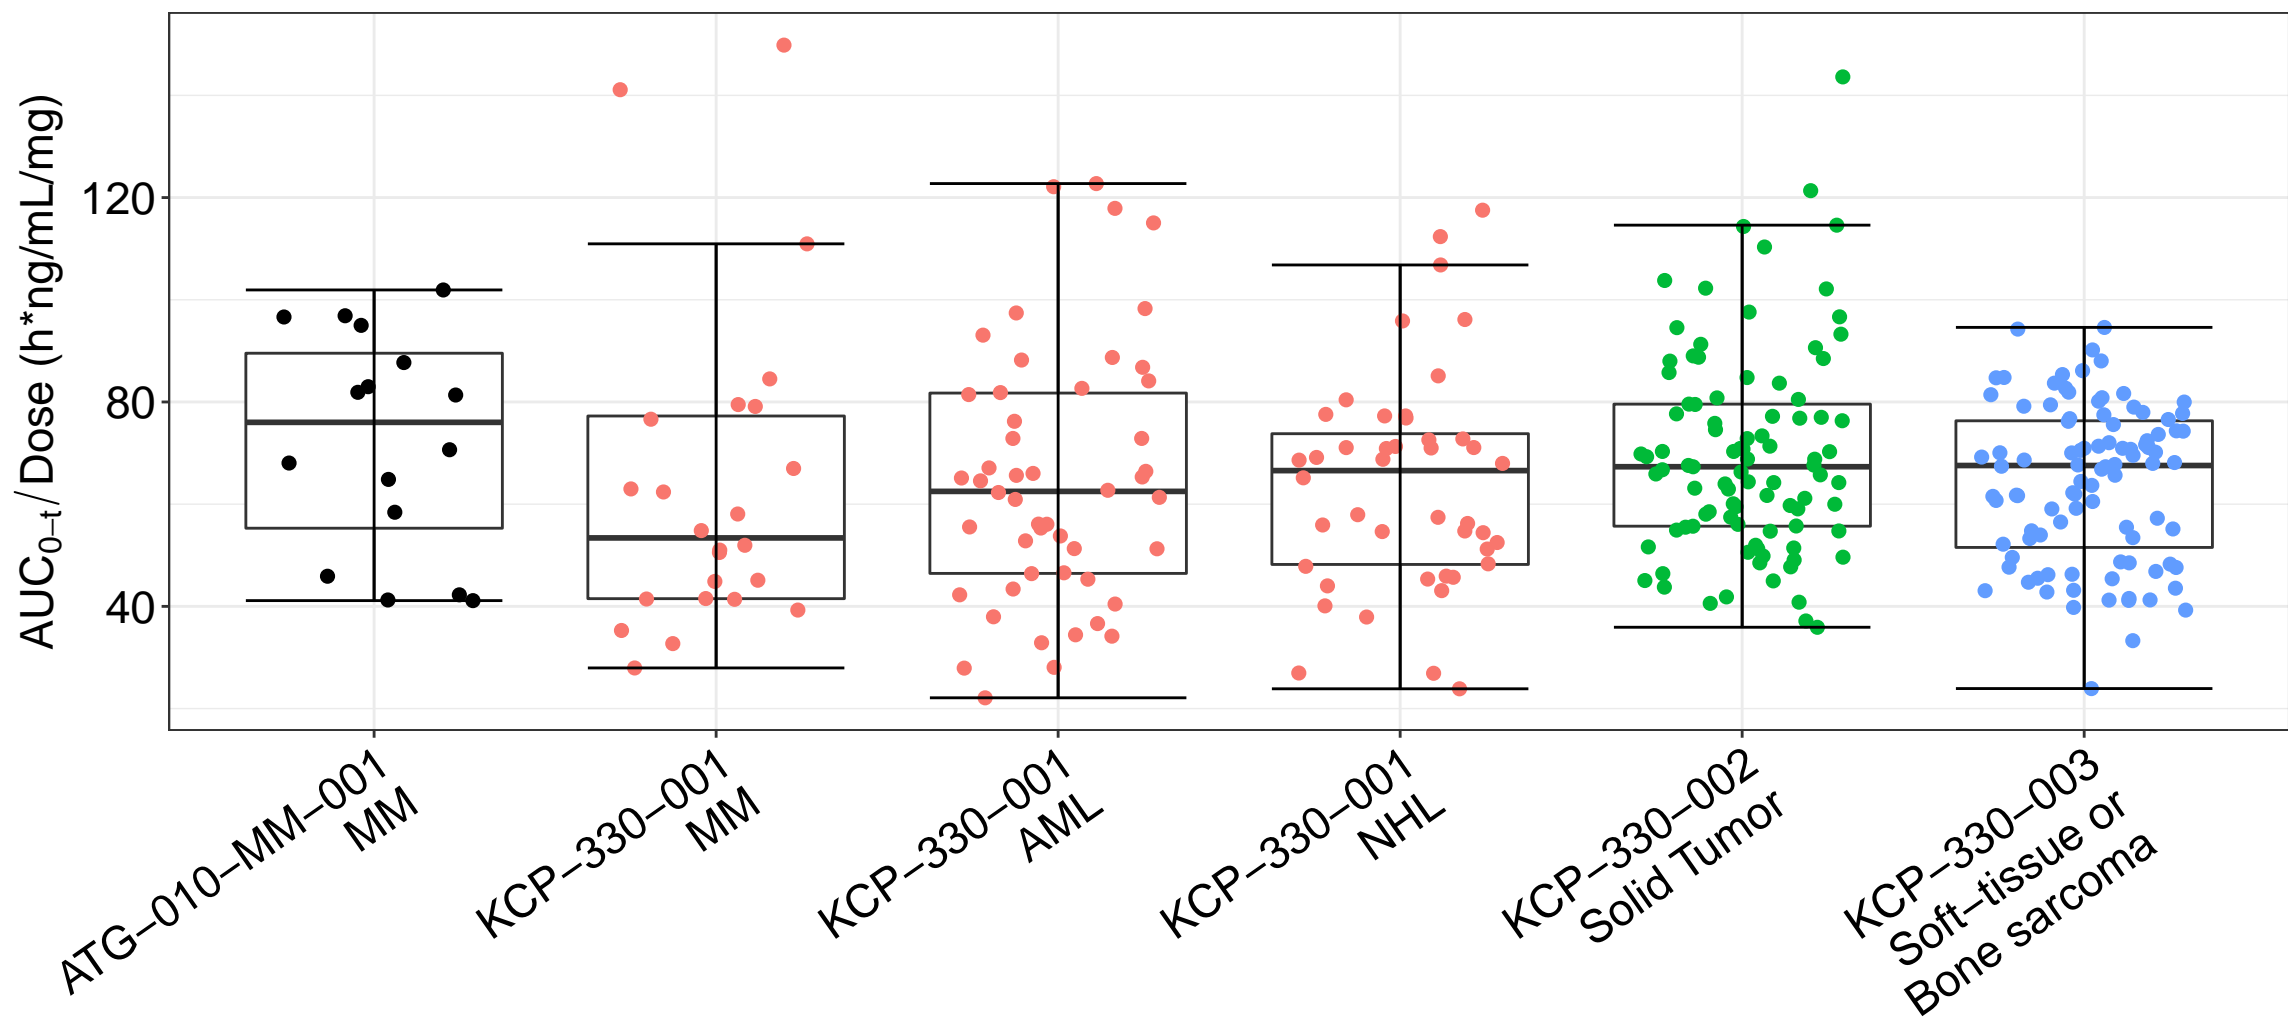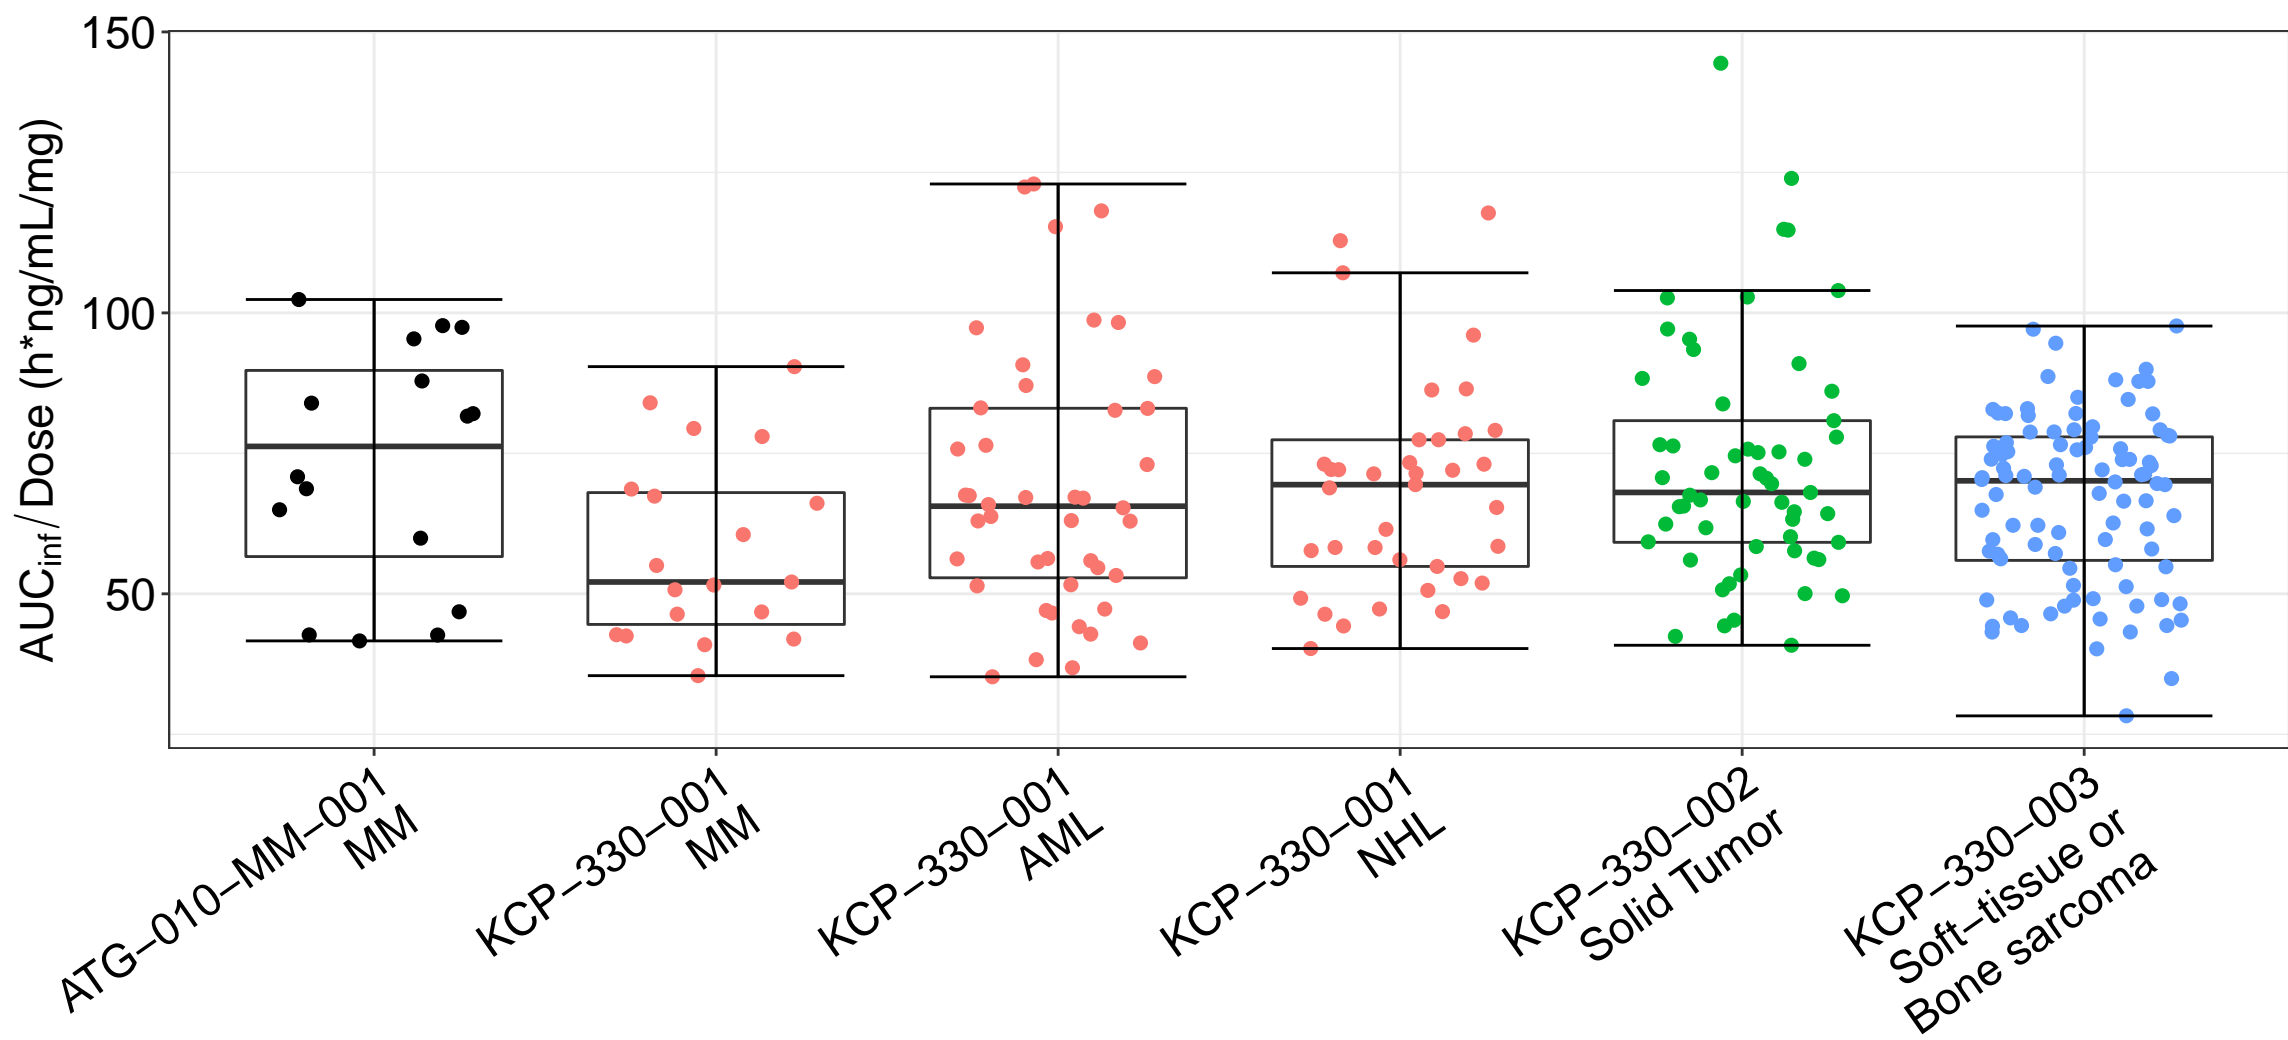

Supplement: 12916_2022_2305_MOESM1_ESM.pdf [file 12916_2022_2305_MOESM1_ESM.pdf]
